# Supplementary material
Source: PubMed Central journal article supplement (PMC8721349)
Supplement: mmc1.pdf [file mmc1.pdf]

## **MATERIAL SUPLEMENTARIO**

### ***APÉNDICE 1. Detalle de los análisis estadísticos realizados***

En primer lugar, se llevó a cabo un análisis descriptivo de las características sociodemográficas y clínicas de los participantes en el cuestionario (evaluación del período pre-COVID-19 y del período COVID-19) utilizando frecuencias (con porcentajes) para las variables categóricas y medias (y desviaciones estándar) para las variables continuas. Se compararon las características de los participantes en ambas evaluaciones mediante la prueba Chi<sup>2</sup> de Pearson para las variables categóricas y t-test o prueba de suma de rangos de Wilcoxon para las variables continuas.

A continuación, se llevó a cabo un análisis descriptivo de los ítems de las dos escalas analizadas y se calculó la puntuación media de todas las escalas del cuestionario PREOS-PC a nivel global y agrupada por centro de salud (Apéndice 2). La puntuación de cada escala se calculó como el porcentaje de la puntuación máxima alcanzable para la combinación de todos los ítems de la escala, con puntuaciones que van de 0 a 100 (puntuaciones más altas corresponden a niveles más altos de seguridad del paciente). Para las escalas con varios ítems, se consideró como valor perdido en caso de faltar respuestas para más del 50% de los ítems que componen la escala. En caso contrario, se obtuvo una puntuación basada en los elementos disponibles sin ninguna imputación.

En el caso de la medida del período COVID-19, se aplicaron ponderaciones de probabilidad inversa en base a las características de los participantes de la evaluación del período pre-COVID (sexo, edad (3 categorías) y nivel de estudios), para obtener una muestra más comparable. Se calcularon los pesos de probabilidad para las 3 variables para cada centro de salud. Por último, los 3 pesos se multiplicaron y reescalaron para que las muestras ponderadas coincidieran con el número de cuestionarios recogidos en la evaluación del período pre-COVID-19. Se compararon las respuestas en las dos evaluaciones (período pre-COVID-19 vs período COVID-19 ponderado) mediante la prueba Chi<sup>2</sup> de Pearson para las variables categóricas y t-Student para las variables continuas (para muestras independientes para las puntuaciones globales, y muestras pareadas para los datos agrupados por centro de salud). Por último, se calculó el tamaño de efecto de la diferencia entre la puntuación de las escalas entre los dos períodos mediante la *d* de Cohen. En las tablas se muestran los resultados no ponderados y ponderados (entre corchetes) para los ítems del cuestionario y las escalas; los resultados del texto principal están ponderados.

Para analizar si existen diferencias del impacto de la pandemia de COVID-19 en la seguridad del paciente para los diferentes grupos poblacionales, se realizaron análisis de regresión para las evaluaciones del período pre-COVID-19 y del período COVID-19, de las escalas del cuestionario PREOS-PC “Experiencias de errores de seguridad” e “Impacto del daño”.

Como variables predictoras y de ajuste se utilizaron las siguientes variables

- Datos sociodemográficos de los participantes: sexo, edad, país de origen, nivel de estudios, situación laboral, estado de salud, años registrados en el centro de salud, número de visitas al centro en los últimos 12 meses, número de enfermedades crónicas y número de medicamentos.

- Datos de los centros de salud: número profesionales del centro, número pacientes registrados, proporción de mujeres, proporción de pacientes mayores de 65 años, centro docente (si, no)

Para investigar las relaciones entre las dos escalas del cuestionario PREOS-PC “Experiencias de errores de seguridad” e “Impacto del daño” (variables dependientes) y las características del paciente y de los centros de salud se utilizaron modelos de regresión lineal multivariado multinivel, estableciendo el nivel centro de salud como variable de efectos aleatorios para todos los modelos, y teniendo en cuenta la agrupación de pacientes dentro de cada centro <sup>1</sup>.

Para cada escala se realizaron tres análisis multivariados: uno para la muestra del período pre-COVID-19, otro para la muestra del período COVID-19, y un tercero para la muestra total, incluyendo la interacción de la variable "período de evaluación" con el resto de las variables independientes. Los tres modelos multivariantes correspondientes a la misma escala se construyeron con las mismas variables independientes, para que fuesen comparables entre ellos. Las variables predictoras y de ajuste para cada modelo se seleccionaron en base a los siguientes criterios:

- En todos los modelos se incluyeron las variables edad, sexo, nivel educativo y zona de salud, como medida de ajuste entre las diferentes poblaciones y zonas de salud.

- El resto de las variables se seleccionaron mediante análisis univariados multinivel (centro de salud como variable de efectos aleatorios) para examinar la relación de las escalas con cada variable de forma independiente. Se realizaron modelos univariados para la muestra del período pre-COVID19 y del período COVID19 (Apéndice 3) y se seleccionaron para ser incluidas en el modelo multivariado aquellas variables que presentaron una relación univariante superior al 90% ( $p < 0,1$ ) en alguno de los dos modelos univariados de la misma escala.

En los modelos de regresión multivariados mixtos se utilizó  $\alpha = 5\%$  como umbral de significación estadística.

Las puntuaciones de los pacientes para las tres escalas mostraron distribuciones muy asimétricas. Por lo tanto, para verificar la solidez de nuestros resultados a la no normalidad y no homocedasticidad, la significancia de las variables predictoras en nuestros modelos multivariados finales se validaron mediante Bootstrap, utilizando P valores basados en percentiles. Se utilizaron muestras bootstrap de 1000 réplicas <sup>1,2</sup>.

Todos los análisis estadísticos se llevaron a cabo con el programa estadístico STATA 15.1 (StataCorp, College Station, Texas). Los modelos de regresión multinivel (univariados y multivariados) se realizaron con el comando *mixed*. Los análisis de bootstrap se realizaron con el comando *bootstrap*.

## APÉNDICE 2.

Tabla A2.1 Evaluación de la seguridad del paciente por parte de los pacientes (PREOS-PC) en 29 centros de salud de Atención Primaria españoles. Puntuación agregada por Centro de Salud

|                                                          | Puntuación agregada por Centro de Salud (n=29) |                                                                       |                |
|----------------------------------------------------------|------------------------------------------------|-----------------------------------------------------------------------|----------------|
| Escalas PREOS-PC <sup>a</sup>                            | Período pre-COVID-19<br><i>Media (IC95%)</i>   | Período COVID-19<br><i>Media (IC95%)</i><br><i>[datos ponderados]</i> | p <sup>b</sup> |
| PUNTUACIÓN ESCALA "EXPERIENCIAS DE ERRORES DE SEGURIDAD" | 92,62 (91,44; 93,81)                           | 88,58 (87,00; 90,17)<br>[88,80(87,27;90,32)]                          | <0,001         |
| PUNTUACIÓN ESCALA "DAÑO"                                 | 96,90 (96,17; 97,63)                           | 81,49 (75,38; 87,60)<br>[80,03(73,26; 86,81)]                         | <0,001         |

*IC95%, intervalo de confianza del 95%; n, número de centros de Salud*

<sup>a</sup> El rango teórico de ambas escalas oscila entre 0 (máximo nivel de errores/daño) y 100 (ningún error/daño).

<sup>b</sup> *Diferencia entre el período pre-COVID-19 y el período COVID-19 (datos ponderados) evaluado mediante t-Student para datos pareados.*

**APÉNDICE 3. Análisis de regresión bivariados para la selección de variables explicativas de los modelos multivariados.**

Tabla A3.1. Modelos bivariados para la escala experiencias de errores de seguridad.

|                                           | EXPERIENCIAS DE ERRORES DE SEGURIDAD |                 |        |                  |                 |        |
|-------------------------------------------|--------------------------------------|-----------------|--------|------------------|-----------------|--------|
|                                           | PERÍODO PRE-COVID-19                 |                 |        | PERÍODO COVID-19 |                 |        |
|                                           | N (%)                                | Coef. $\beta^s$ | P      | N (%)            | Coef. $\beta^s$ | P      |
| <b>VARIABLES PACIENTES</b>                |                                      |                 |        |                  |                 |        |
| Sexo                                      |                                      |                 | <0,001 |                  |                 | <0,001 |
| Hombre                                    | 763 (34,7)                           | 1               | -      | 775 (39,5)       | 1               | -      |
| Mujer                                     | 1433 (65,3)                          | -2,093          | -      | 1179 (60)        | -4,075          | -      |
| Edad (años)                               | 2196 (100)                           | 0,115           | <0,001 | 1955 (99,5)      | 0,167           | <0,001 |
| País de origen                            |                                      |                 | 0,003  |                  |                 | 0,632  |
| España                                    | 1962 (89,3)                          | 1               | -      | 1735 (88,3)      | 1               | -      |
| Otro país europeo                         | 76 (3,5)                             | -3,279          | -      | 55 (2,8)         | -2,119          | -      |
| Otro país no europeo                      | 158 (7,2)                            | -2,732          | -      | 164 (8,4)        | 0,343           | -      |
| Nivel educativo                           |                                      |                 | <0,001 |                  |                 | 0,943  |
| Sin estudios                              | 518 (23,6)                           | 1               | -      | 221 (11,3)       | 1               | -      |
| Estudios no universitarios                | 1261 (57,4)                          | -2,557          | -      | 1134 (57,7)      | -0,077          | -      |
| Estudios universitarios                   | 417 (19,0)                           | -3,521          | -      | 599 (30,5)       | -0,354          | -      |
| Situación profesional                     |                                      |                 | <0,001 |                  |                 | <0,001 |
| Trabajador                                | 1060 (48,3)                          | 1               | -      | 1086 (55,3)      | 1               | -      |
| Jubilado                                  | 772 (35,2)                           | 2,005           | -      | 437 (22,3)       | 2,674           | -      |
| Otros (estudiante, desempleado, etc.)     | 364 (16,6)                           | -2,432          | -      | 431 (21,9)       | -3,059          | -      |
| N.º de visitas al CS                      |                                      |                 | 0,106  |                  |                 | <0,001 |
| Entre 1 y5                                | 1159 (52,8)                          | 1               | -      | 1393 (70,9)      | 1               | -      |
| Entre 6 y10                               | 547 (24,9)                           | -1,297          | -      | 298 (15,2)       | -2,439          | -      |
| Más de 10                                 | 448 (20,4)                           | -0,730          | -      | 150 (7,6)        | -6,374          | -      |
| Antigüedad de inscripción en el CS (años) |                                      |                 | 0,001  |                  |                 | 0,192  |
| Menos de 2                                | 135 (6,1)                            | 1               | -      | 113 (5,8)        | 1               | -      |
| Entre 2 y 5                               | 170 (7,7)                            | 2,026           | -      | 183 (9,3)        | -3,400          | -      |
| Más de 5                                  | 1891 (86,1)                          | 3,695           | -      | 1658 (84,4)      | -2,865          | -      |
| Estado de salud percibido                 |                                      |                 | <0,001 |                  |                 | <0,001 |
| Bueno o muy bueno                         | 1324 (60,3)                          | 1               | -      | 1200 (61,1)      | 1               | -      |
| Regular                                   | 676 (30,8)                           | -2,085          | -      | 541 (27,5)       | -7,226          | -      |
| Malo o muy malo                           | 196 (8,9)                            | -7,178          | -      | 213 (10,8)       | -14,425         | -      |
| N.º de medicamentos diarios               | 2150 (97,9)                          | 0,009           | 0,921  | 1945 (99,0)      | -0,287          | 0,038  |
| N.º enfermedades crónicas                 | 2196 (100)                           | -0,221          | 0,066  | 1934 (98,5)      | -0,719          | <0,001 |
| <b>VARIABLES DE CS</b>                    |                                      |                 |        |                  |                 |        |
| Nº de pacientes                           | 2196 (100)                           | -0,001          | 0,036  | 1964 (100)       | -0,0001         | 0,412  |
| Nº de profesionales                       | 2196 (100)                           | -0,007          | 0,860  | 1964 (100)       | -0,187          | <0,001 |
| % pacientes > 65 años                     | 2196 (100)                           | 0,473           | <0,001 | 1964 (100)       | -0,227          | 0,219  |
| % mujeres                                 | 2196 (100)                           | 0,124           | 0,773  | 1964 (100)       | 0,010           | 0,864  |
| Centro docente                            |                                      |                 | 0,477  |                  |                 | 0,069  |
| NO                                        | 1731 (78,8)                          | 1               | -      | 1509 (76,8)      | 1               | -      |
| SI                                        | 654 (29,9)                           | -0,980          | -      | 445 (22,7)       | -3,226          | -      |
| Zona de salud                             |                                      |                 | 0,002  |                  |                 | <0,001 |
| Mallorca                                  | 1024 (46,6)                          | 1               | -      | 847 (43,1)       | 1               | -      |
| Cataluña Central                          | 396 (18,0)                           | 4,563           | -      | 420 (21,4)       | -6,270          | -      |
| Camp de Tarragona                         | 776 (35,3)                           | 1,882           | -      | 687 (35,0)       | -5,180          | -      |

CS, centro de salud; N, número de pacientes;  $\beta^s$  Coeficiente  $\beta$  para cada variable en el modelo multinivel bivariado

Tabla A3.2. Modelos bivariados para la escala gravedad del daño.

|                                    | GRAVEDAD DEL DAÑO    |                 |        |                  |                 |        |
|------------------------------------|----------------------|-----------------|--------|------------------|-----------------|--------|
|                                    | PERÍODO PRE-COVID-19 |                 |        | PERÍODO COVID-19 |                 |        |
|                                    | N (%)                | Coef. $\beta^s$ | P      | N (%)            | Coef. $\beta^s$ | P      |
| <b>VARIABLES PACIENTES</b>         |                      |                 |        |                  |                 |        |
| <b>Sexo</b>                        |                      |                 | 0,563  |                  |                 | <0,001 |
| Hombre                             | 764 (34,7)           | 1               | -      | 776 (39,7)       | 1               | -      |
| Mujer                              | 1435 (65,3)          | -0,296          | -      | 1179 (60,3)      | -8,572          | -      |
| <b>Edad (años)</b>                 | 2199 (100)           | 0,051           | <0,001 | 1955 (100)       | 0,359           | <0,001 |
| <b>País de origen</b>              |                      |                 | 0,213  |                  |                 | 0,489  |
| España                             | 1964 (89,3)          | 1               | -      | 1736 (88,8)      | 1               | -      |
| Otro país europeo                  | 76 (3,5)             | -1,837          | -      | 55 (2,8)         | -3,584          | -      |
| Otro país no europeo               | 159 (7,2)            | 0,975           | -      | 164 (8,4)        | -2,114          | -      |
| <b>Nivel educativo</b>             |                      |                 | 0,233  |                  |                 | 0,872  |
| Sin estudios                       | 521 (23,7)           | 1               | -      | 221 (11,3)       | 1               | -      |
| Estudios no universitarios         | 1261 (57,3)          | -0,562          | -      | 1134 (58,0)      | -0,715          | -      |
| Estudios universitarios            | 417 (19,0)           | -1,299          | -      | 600 (30,7)       | -1,241          | -      |
| <b>Situación profesional</b>       |                      |                 | <0,001 |                  |                 | <0,001 |
| Trabajando                         | 1060 (48,2)          | 1               | -      | 1087 (55,6)      | 1               | -      |
| Jubilado                           | 774 (35,2)           | 0,238           | -      | 437 (22,4)       | 10,708          | -      |
| Otros                              | 365 (16,6)           | -2,955          | -      | 431 (22,0)       | 0,532           | -      |
| <b>N.º de visitas al CS</b>        |                      |                 | <0,001 |                  |                 | 0,023  |
| Entre 1 y 5                        | 1161 (52,8)          | 1               | -      | 1393 (71,3)      | 1               | -      |
| Entre 6 y 10                       | 548 (24,9)           | -1,133          | -      | 298 (15,2)       | -4,966          | -      |
| Más de 10                          | 448 (20,4)           | -3,416          | -      | 150 (7,7)        | -2,233          | -      |
| <b>Años registrado en el CS</b>    |                      |                 | 0,066  |                  |                 | 0,984  |
| Menos de 2                         | 135 (6,1)            | 1               | -      | 113 (5,8)        | 1               | -      |
| Entre 2 y 5                        | 171 (7,8)            | -1,652          | -      | 183 (9,4)        | 0,382           | -      |
| Más de 5                           | 1893 (86,1)          | 0,467           | -      | 1659 (84,9)      | 0,498           | -      |
| <b>Estado de salud percibido</b>   |                      |                 | <0,001 |                  |                 | 0,215  |
| Bueno o muy bueno                  | 1324 (60,2)          | 1               | -      | 1201 (61,4)      | 1               | -      |
| Regular                            | 678 (30,8)           | -1,382          | -      | 541 (27,7)       | -2,173          | -      |
| Malo o muy malo                    | 197 (9,0)            | -6,398          | -      | 213 (10,9)       | -2,971          | -      |
| <b>N.º de medicamentos diarios</b> | 2153 (97,9)          | -0,233          | 0,005  | 1946 (99,5)      | 0,782           | 0,001  |
| <b>N.º enfermedades crónicas</b>   | 2199 (100)           | -0,464          | <0,001 | 1935 (99,0)      | 0,745           | 0,031  |
| <b>VARIABLES DE CS</b>             |                      |                 |        |                  |                 |        |
| <b>Nº de pacientes</b>             | 2199 (100)           | -0,001          | 0,120  | 1955 (100)       | 0,0001          | 0,886  |
| <b>Nº de profesionales</b>         | 2199 (100)           | -0,032          | 0,227  | 1955 (100)       | -0,548          | 0,007  |
| <b>% pacientes &gt; 65 años</b>    | 2199 (100)           | 0,024           | 0,779  | 1955 (100)       | -1,913          | 0,003  |
| <b>% mujeres</b>                   | 2199 (100)           | -0,123          | 0,641  | 1955 (100)       | 1,672           | 0,450  |
| <b>Centro docente</b>              |                      |                 | 0,719  |                  |                 | 0,293  |
| NO                                 | 1734 (78,9)          | 1               | -      | 1510 (77,2)      | 1               | -      |
| SI                                 | 465 (21,1)           | -0,308          | -      | 445 (22,8)       | -7,460          | -      |
| <b>Zona de salud</b>               |                      |                 |        |                  |                 | <0,001 |
| Mallorca                           | 1024 (46,6)          | 1               | -      | 847 (43,3)       | 1               | -      |
| Cataluña Central                   | 399 (18,1)           | 0,606           | -      | 420 (21,5)       | -30,189         | -      |
| Camp de Tarragona                  | 776 (35,3)           | 0,801           | -      | 688 (35,2)       | -31,542         | -      |

CS, centro de salud; N, número de pacientes;  $\beta^s$  Coeficiente  $\beta$  para cada variable en el modelo multinivel bivariado

## **Bibliografía**

1. Ricci-Cabello I, Reeves D, Bell BG, Valderas JM. Identifying patient and practice characteristics associated with patient-reported experiences of safety problems and harm: a cross-sectional study using a multilevel modelling approach. *BMJ Qual Saf.* 2017;26(11):899-907. <http://dx.doi.org/10.1136/bmjqs-2016-006411>
2. Mooney CZ, Duval RD. *Bootstrapping: A nonparametric approach to statistical inference.* Thousand Oaks, CA, US: Sage Publications, Inc; 1993. vi, 73-vi, p. <http://dx.doi.org/10.4135/9781412983532>
